# Supplementary material for: Crystallization of triple- and quadruple-stranded dinuclear bis-β-diketonate-Dy(iii) helicates: single molecule magnetic behavior
Source: Royal Society of Chemistry journal article supplement (doi:10.1039/c5ce01067e), 2015-01-01
Supplement: c5ce01067e1.pdf [file c5ce01067e1.pdf]

## Supporting Informations for

### Crystallization of Triple- and Quadruple-Stranded Dinuclear Bis- $\beta$ -diketonate-Dy(III)

#### Helicates: Single Molecule Magnet Behavior

Peng Chen,<sup>a</sup> Hongfeng Li,<sup>a</sup> Wenbin Sun,<sup>a</sup> Jinkui Tang,<sup>\*b</sup> Lei Zhang<sup>a</sup> and Pengfei Yan<sup>\*a</sup>

a. Key Laboratory of Functional Inorganic Material Chemistry (MOE), School of Chemistry and Materials Science, Heilongjiang University, Harbin 150080, P.R. China E-mail: yanpf@vip.sina.com

b. State Key Laboratory of Rare Earth Resource Utilization, Changchun Institute of Applied Chemistry, Chinese Academy of Sciences, Changchun 130022, P.R. China. Email: tang@ciac.ac.cn

## Synthesis of N-methyl-4, 4'-diacetyldiphenylamine (MDA)

A 100-mL round-bottomed Schlenk flask was charged with anhydrous  $\text{AlCl}_3$  (1.82 g, 13.6 mmol) and dry dichloromethane (50 ml), and acetyl chloride (1.07 g, 13.6 mmol), resulting in a yellow transparent solution. A dry dichloromethane solution of N-methyl-phenylaniline (1.00 g, 5.46 mmol) was added dropwise to the above solution at  $-20\text{ }^\circ\text{C}$ . After kept 12 hours at room temperature, the resulting mixture was poured into 50mL ice-water and alkalized to  $\text{pH}=7$  using the aqueous solution of NaOH. The resulting organic layer was dehydrated by anhydrous sodium sulfate about 5 hours and then filtered. The crude product was chromatographed with petroleum ether/ethyl acetate (v/v, 5/1), and then the white product of V-shaped MDA was dried in vacuum (0.93 g, 64 wt%). Anal. Calc. for  $\text{C}_{17}\text{H}_{17}\text{NO}_2$  (267.32): C, 76.38; H, 6.41; N, 5.24 wt%. Found: C, 76.37; H, 6.40 N, 5.24 wt%. IR (KBr,  $\text{cm}^{-1}$ ): 3446 (w), 1600 (s), 1590 (m), 1401 (m), 1363 (s), 1264 (s).  $^1\text{H}$  NMR (400 MHz, DMSO- $d_6$ ,  $25\text{ }^\circ\text{C}$ , TMS):  $\delta= 7.92$  (d,  $J = 8.77$  Hz, 4H),  $7.20$  (d,  $J = 8.77$  Hz, 4H),  $3.42$  ppm (s, 3H),  $2.52$  ppm (s, 6H). The  $^1\text{H}$  NMR spectrum of MDA was shown in Figure S1.

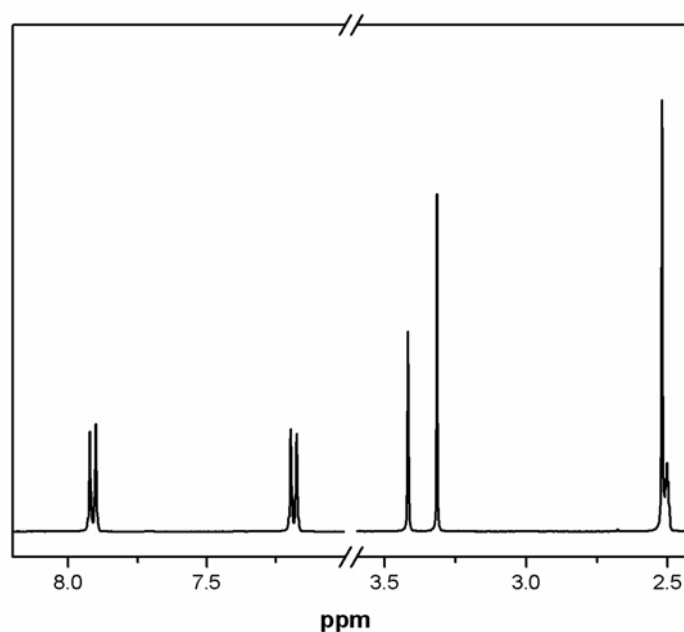

**Figure S1**  $^1\text{H}$  NMR spectrum of MDA

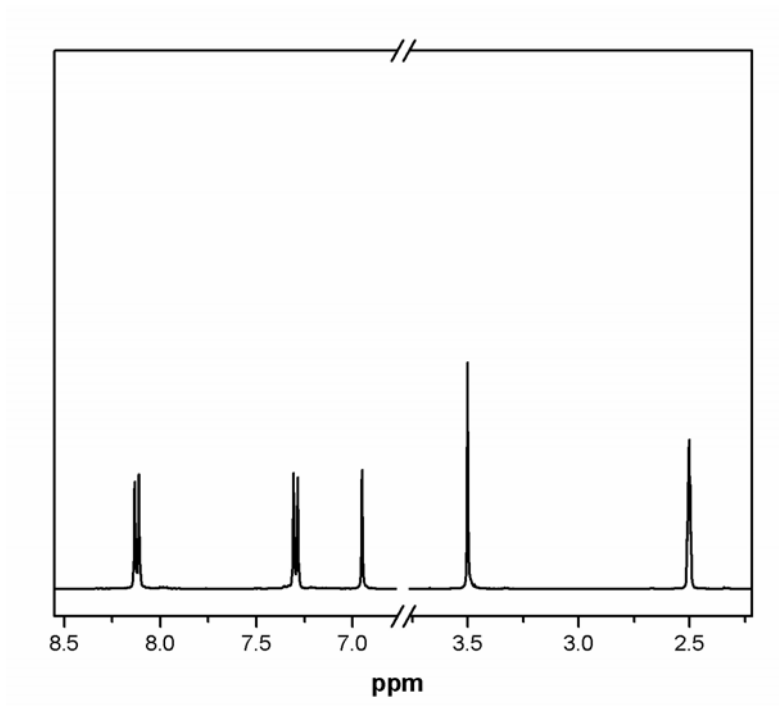

**Figure S2**  $^1\text{H}$  NMR spectrum of  $\text{H}_2\text{MBDA}$

## Structure determination

Suitable single crystals of **1**, **2** and MDA were selected for single crystal X-ray diffraction analysis. Diffraction intensity data were collected on an Oxford Diffraction Xcalibur Eos diffractometer with graphite-monochromated Mo K $\alpha$  radiation ( $\lambda = 0.71073 \text{ \AA}$ ). All data were collected at a temperature of 150 K. The structures were solved by the direct methods and refined on  $F^2$  by full-matrix least-squares using the SHELXTL-97 program.<sup>[1]</sup> The Ln<sup>3+</sup> ions were easily located and then non-hydrogen atoms (Cl, F, O, N and C) were placed from the subsequent Fourier-difference maps. In the case of **1**, Cl2 ion is located on a twofold axis and one Et<sub>3</sub>NH molecule is disordered with N(9) atom lied on a twofold axis as well. A summary for data collection and refinements were given in Table S1. CCDC: 1054122-4 contained the supplementary crystallographic data for this paper. These data could be obtained free of charge from the Cambridge Crystallographic Data Centre via [www.ccdc.cam.ac.uk/data\\_request/cif](http://www.ccdc.cam.ac.uk/data_request/cif).

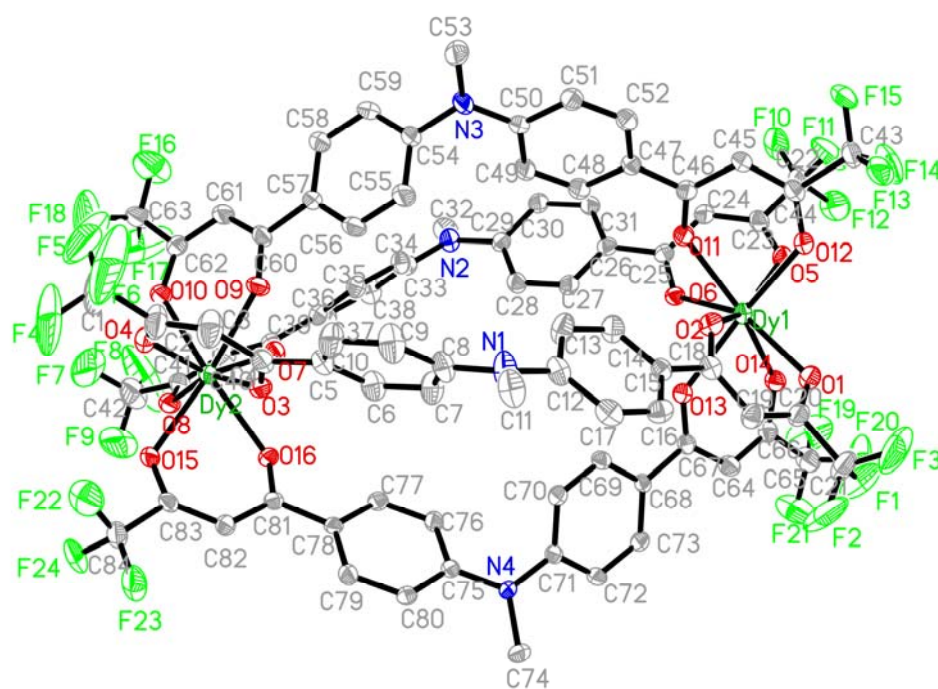

**Figure S3** ORTEP plot of **1**. The thermal ellipsoids are given at 50% probability (H atoms and guest species have been omitted for clarity).

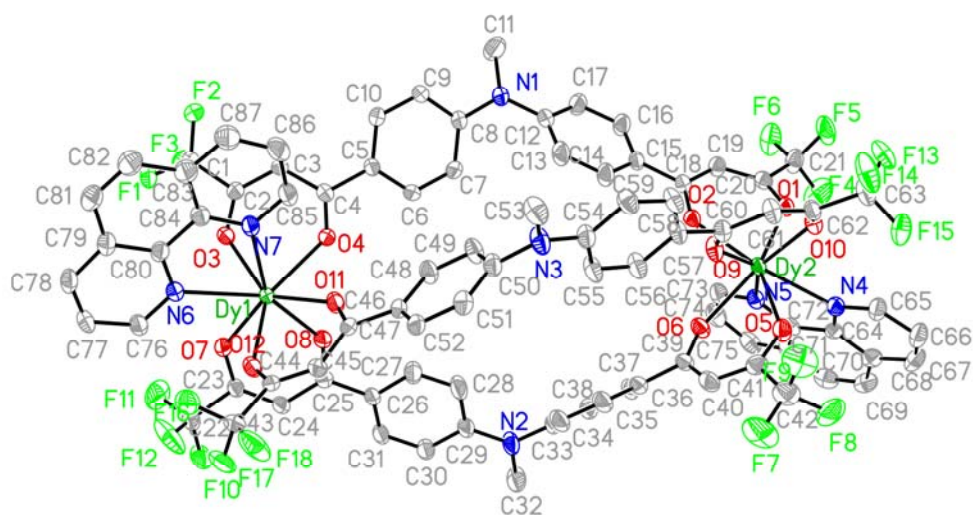

**Figure S4** ORTEP plot of **2**. The thermal ellipsoids are given at 50% probability (H atoms and guest species have been omitted for clarity).

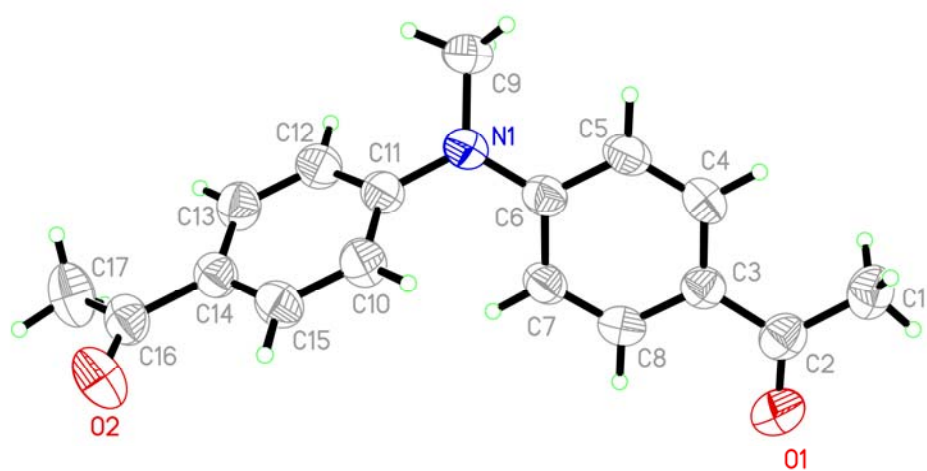

**Figure S5** ORTEP plot of V-shaped MDA. The thermal ellipsoids are given at 50% probability.

**Table S1** Crystal data and structural refinement for **1**, **2** and MDA.

| Code                                                           | <b>1</b>                                                                                                             | <b>2</b>                                                                                           | MDA                                                           |
|----------------------------------------------------------------|----------------------------------------------------------------------------------------------------------------------|----------------------------------------------------------------------------------------------------|---------------------------------------------------------------|
| formula                                                        | C <sub>116</sub> H <sub>130</sub> Cl <sub>1.5</sub> Dy <sub>2</sub> F <sub>24</sub> N <sub>9.5</sub> O <sub>18</sub> | C <sub>95</sub> H <sub>72.5</sub> Dy <sub>2</sub> F <sub>18</sub> N <sub>7.5</sub> O <sub>14</sub> | C <sub>17</sub> H <sub>17</sub> N <sub>2</sub> O <sub>2</sub> |
| Mr                                                             | 2779.47                                                                                                              | 2210.10                                                                                            | 267.32                                                        |
| color                                                          | Colorless                                                                                                            | Colorless                                                                                          | Colorless                                                     |
| crystal system                                                 | Monoclinic                                                                                                           | Triclinic                                                                                          | Triclinic                                                     |
| space group                                                    | <i>C2/c</i>                                                                                                          | <i>P</i> -1                                                                                        | <i>P</i> -1                                                   |
| Temperature (K)                                                | 150                                                                                                                  | 150                                                                                                | 150                                                           |
| <i>a</i> (Å)                                                   | 45.2139(5)                                                                                                           | 12.1694(4)                                                                                         | 8.2376(6)                                                     |
| <i>b</i> (Å)                                                   | 20.4624(2)                                                                                                           | 19.7909(5)                                                                                         | 8.5362(7)                                                     |
| <i>c</i> (Å)                                                   | 28.0974(3)                                                                                                           | 21.6427(6)                                                                                         | 10.4219(9)                                                    |
| $\alpha$ (deg)                                                 | 90                                                                                                                   | 66.933(3)                                                                                          | 94.615(7)                                                     |
| $\beta$ (deg)                                                  | 100.5900(12)                                                                                                         | 75.128(3)                                                                                          | 98.690(7)                                                     |
| $\gamma$ (deg)                                                 | 90                                                                                                                   | 87.379(2)                                                                                          | 99.967(7)                                                     |
| <i>V</i> (Å <sup>3</sup> )                                     | 25552.4(5)                                                                                                           | 4626.3(2)                                                                                          | 709.21(10)                                                    |
| <i>Z</i>                                                       | 8                                                                                                                    | 2                                                                                                  | 2                                                             |
| $\rho$ (g cm <sup>-3</sup> )                                   | 1.445                                                                                                                | 1.587                                                                                              | 1.252                                                         |
| $\mu$ (mm <sup>-1</sup> )                                      | 1.291                                                                                                                | 1.706                                                                                              | 0.082                                                         |
| <i>F</i> (000)                                                 | 11280                                                                                                                | 2202                                                                                               | 2884                                                          |
| Reflections collected/unique                                   | 51469 / 27766                                                                                                        | 41308 / 20844                                                                                      | 5518 / 3204                                                   |
| <i>R</i> <sub>int</sub>                                        | 0.0207                                                                                                               | 0.0236                                                                                             | 0.0143                                                        |
| <i>R</i> <sub>1</sub> , [ <i>I</i> > 2 $\sigma$ ( <i>I</i> )]  | 0.0593                                                                                                               | 0.0338                                                                                             | 0.0476                                                        |
| <i>wR</i> <sub>2</sub> , [ <i>I</i> > 2 $\sigma$ ( <i>I</i> )] | 0.1665                                                                                                               | 0.0849                                                                                             | 0.1089                                                        |
| <i>R</i> <sub>1</sub> , (all data)                             | 0.0742                                                                                                               | 0.0432                                                                                             | 0.0739                                                        |
| <i>wR</i> <sub>2</sub> , (all data)                            | 0.1802                                                                                                               | 0.0906                                                                                             | 0.1295                                                        |
| GOF on <i>F</i> <sup>2</sup>                                   | 1.028                                                                                                                | 1.042                                                                                              | 1.031                                                         |

Table S2 Selected bond lengths (Å) for **1** and **2**.

| <b>1</b> |          |         |          |
|----------|----------|---------|----------|
| Dy1–O11  | 2.359(4) | Dy1–O5  | 2.389(4) |
| Dy1–O6   | 2.385(4) | Dy1–O2  | 2.408(4) |
| Dy1–O12  | 2.376(4) | Dy1–O1  | 2.433(4) |
| Dy1–O13  | 2.364(4) | Dy1–O14 | 2.409(4) |
| Dy2–O3   | 2.367(4) | Dy2–O9  | 2.399(4) |
| Dy2–O4   | 2.372(4) | Dy2–O15 | 2.400(4) |
| Dy2–O7   | 2.373(4) | Dy2–O8  | 2.410(4) |
| Dy2–O16  | 2.386(4) | Dy2–O10 | 2.412(4) |

  

| <b>2</b> |          |         |          |
|----------|----------|---------|----------|
| Dy1–O8   | 2.277(2) | Dy2–O10 | 2.311(2) |
| Dy1–O3   | 2.300(2) | Dy2–O9  | 2.313(2) |
| Dy1–O7   | 2.303(2) | Dy2–O2  | 2.316(2) |
| Dy1–O12  | 2.327(2) | Dy2–O1  | 2.320(2) |
| Dy1–O11  | 2.330(2) | Dy2–O6  | 2.330(2) |
| Dy1–O4   | 2.374(2) | Dy2–O5  | 2.351(2) |
| Dy1–N7   | 2.573(3) | Dy2–N4  | 2.532(3) |
| Dy1–N6   | 2.573(3) | Dy2–N5  | 2.557(3) |



**Table S3** Selected C–H...F and F...F interactions in **1**.

| C–H...F interactions | Distances (Å) | C–H...F interactions | Distances (Å) |
|----------------------|---------------|----------------------|---------------|
| C3–H3A...F6          | 2.729(10)     | C53–H53A...F9_#1     | 3.307(10)     |
| C115–H11H...F18      | 3.11(2)       | C53–H53B...F2_#2     | 3.414(10)     |
| C117–H11S...F18_#3   | 3.22(3)       | C61–H61A...F16       | 2.727(8)      |
| C19–H19A...F2        | 2.736(9)      | C64–H64A...F21       | 2.728(8)      |
| C24–H24A...F10       | 2.726(8)      | C82–H82A...F23       | 2.734(7)      |
| C40–H40A...F8        | 2.704(8)      | C45–H45A...F15       | 2.720(7)      |
| F...F interactions   | Distances (Å) | F...F interactions   | Distances (Å) |
| F1...F20             | 3.088(8)      | F14...F11            | 3.031(7)      |
| F10...F17_#4         | 3.109(8)      | F17...F10_#4         | 3.109(8)      |
| F11...F14            | 3.031(7)      | F13...F23_#2         | 2.937(6)      |

Symmetry code used to generate the equivalent atoms: #1: x,-y,-1/2+z; #2: 1/2-x,1/2+y,1/2-z; #3: 1-x,y,3/2-z; #4: 1/2-x,1/2-y,1-z.

**Table S4** Selected C–H...F and F...F interactions in **2**.

| C–H...F interactions | Distances (Å) | C–H...F interactions | Distances (Å) |
|----------------------|---------------|----------------------|---------------|
| C3–H3A...F2          | 2.750(4)      | C40–H40A...F7        | 2.730(5)      |
| C3–H3A...F18_#2      | 3.448(5)      | C45–H45A...F18       | 2.738(5)      |
| C19–H19A...F6        | 2.708(4)      | C61–H61A...F14       | 2.733(5)      |
| C24–H24A...F10       | 2.762(4)      | C67–H67A...F3_#3     | 3.142(5)      |
| C32–H32B...F17_#4    | 3.337(4)      |                      |               |
| F...F interactions   | Distances (Å) | F...F interactions   | Distances (Å) |
| F2...F17_#2          | 3.009(3)      | F5...F8_#2           | 3.015(4)      |
| F2...F18_#2          | 2.942(4)      | F6...F11_#1          | 3.098(4)      |
| F11...F6_#1          | 3.098(4)      |                      |               |

Symmetry code used to generate the equivalent atoms: #1: 1-x, 1-y, -z; #2: -1+x, y, z; #3: 1+x, 1+y, -1+z; #4: 2-x, 1-y, -z;

**Table S5** The (Ph)C–N–C(Ph) bond angles in the ligand, and the dihedral angles of the two phenyl groups in the same ligand.

|                                                                             | 1        |          |          |          | 2        |          |          | MDA      |
|-----------------------------------------------------------------------------|----------|----------|----------|----------|----------|----------|----------|----------|
| Code                                                                        | N1       | N2       | N3       | N4       | N1       | N2       | N3       | N1       |
| The (Ph)C–N–C(Ph) bond angles in the ligand containing <i>Nn</i> atom (deg) | 120.9(5) | 120.6(5) | 120.7(5) | 121.2(4) | 122.6(3) | 122.3(3) | 121.6(3) | 121.7(1) |
| The dihedral angles of the two phenyl groups bridging by <i>Nn</i> (deg)    | 62.(2)   | 56.6(2)  | 66.4(2)  | 55.1(2)  | 51.8(10) | 54.7(1)  | 60.3(1)  | 61.7(5)  |

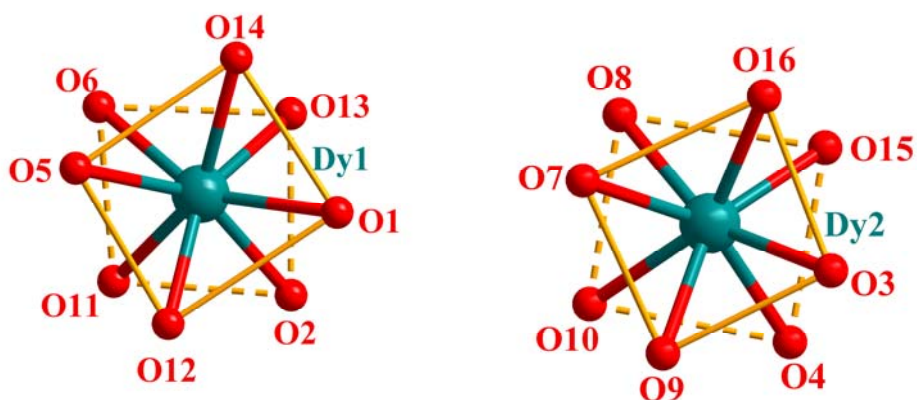

**Figure S6** The coordination geometries of Dy<sup>3+</sup> ions in **1**.

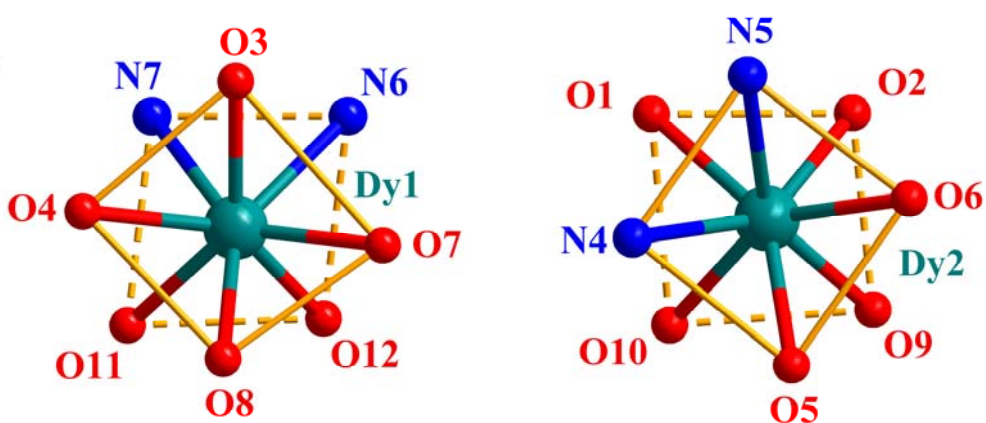

**Figure S7** The coordination geometries of Dy<sup>3+</sup> ions in **2**.

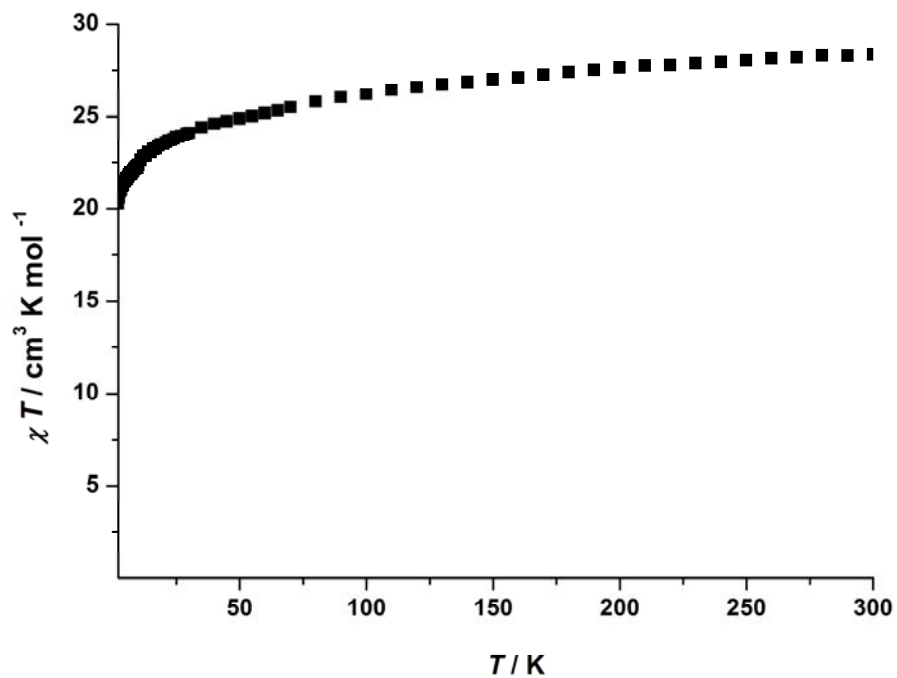

**Figure S8** Plot of  $\chi T$  vs  $T$  for **1** in an applied dc field of 500 Oe in the temperature range of 1.8-300 K.

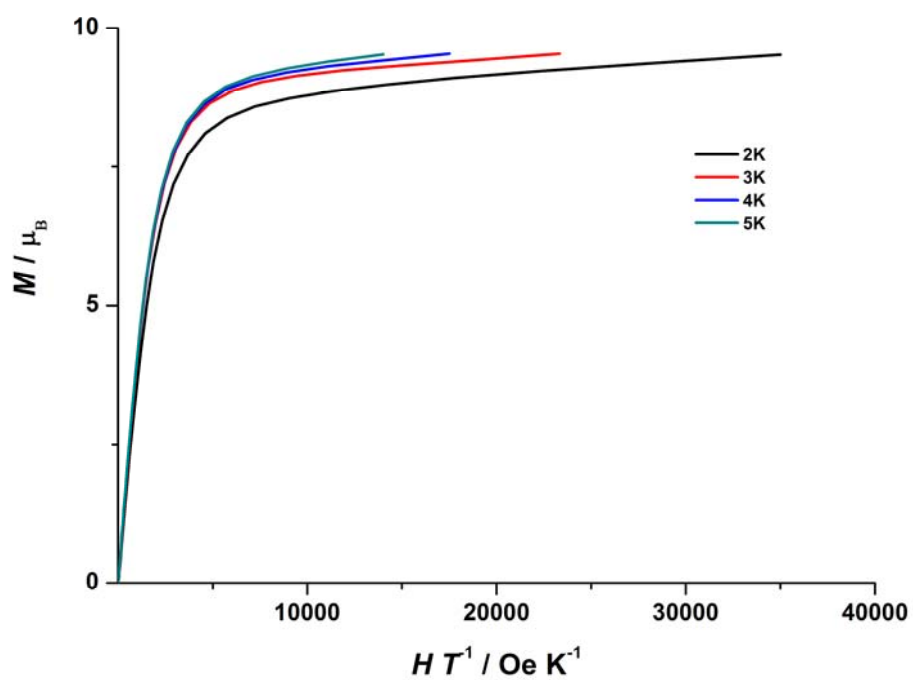

**Figure S9** Magnetization as a function of  $H/T$  for **1**.

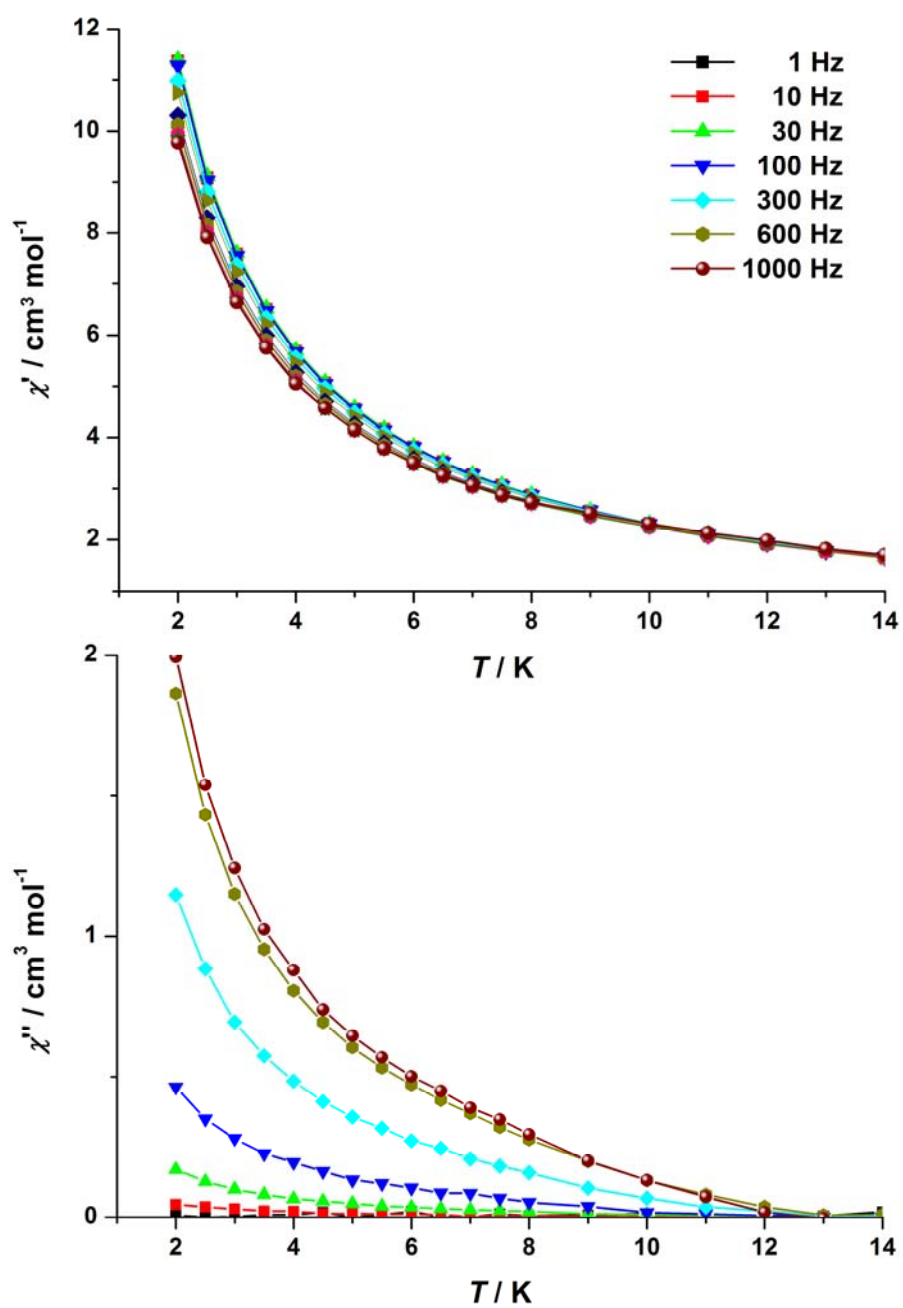

**Figure S10** Temperature dependence of the in-phase ( $\chi'$ , top) and the out-of-phase ( $\chi''$ , bottom) ac susceptibility from 2 to 14 K under zero dc field for **1**.

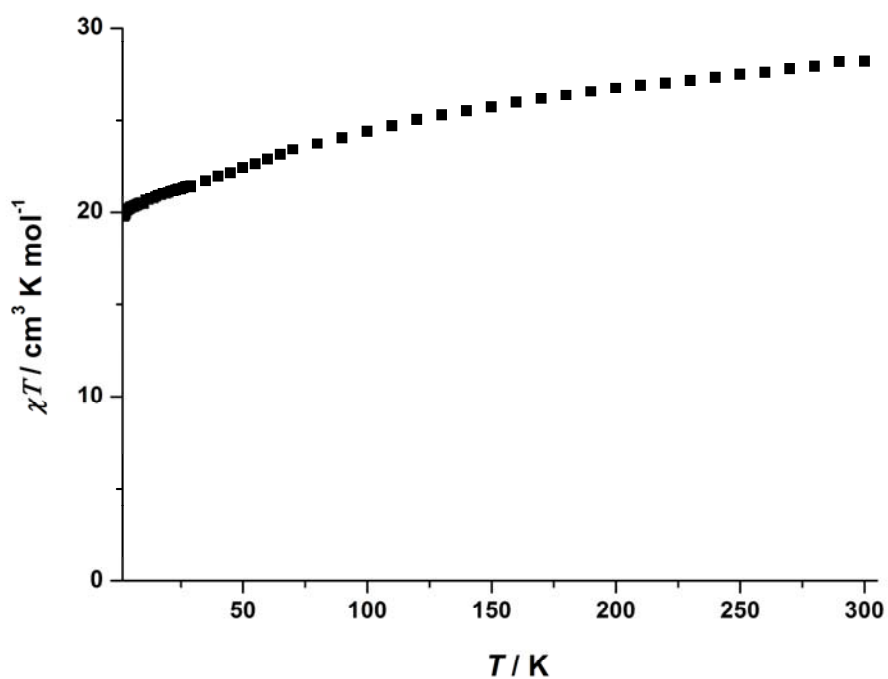

**Figure S11** Plot of  $\chi T$  vs  $T$  for **2** in an applied dc field of 500 Oe in the temperature range of 1.8-300 K.

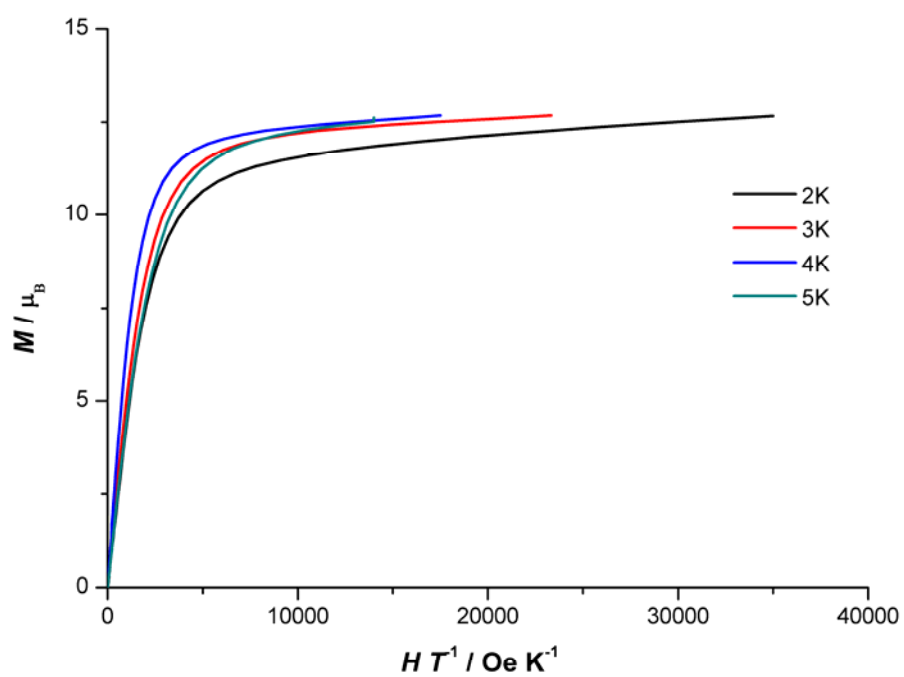

**Figure S12** Magnetization as a function of  $H/T$  for **2**.

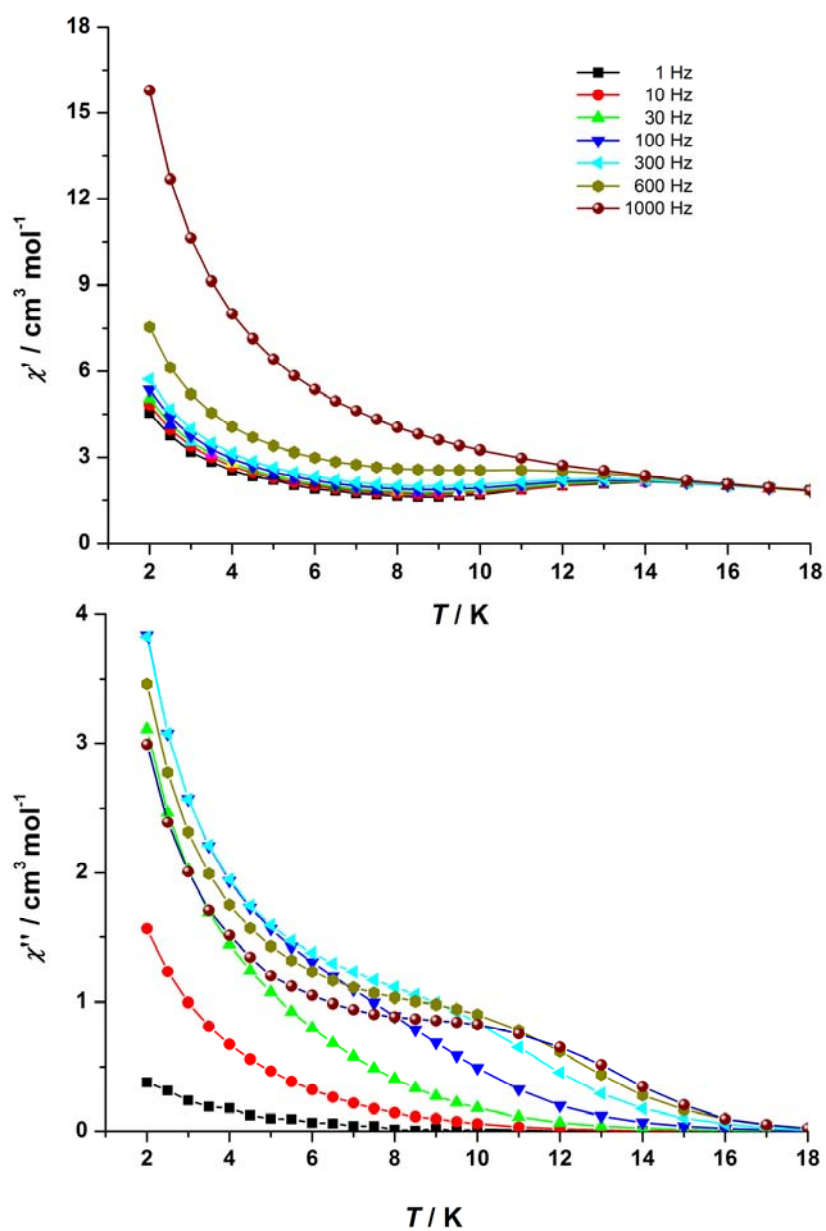

**Figure S13** Temperature dependence of the in-phase ( $\chi'$ , top) and the out-of-phase ( $\chi''$ , bottom) ac susceptibility from 2 to 18 K under zero dc field for **2**.

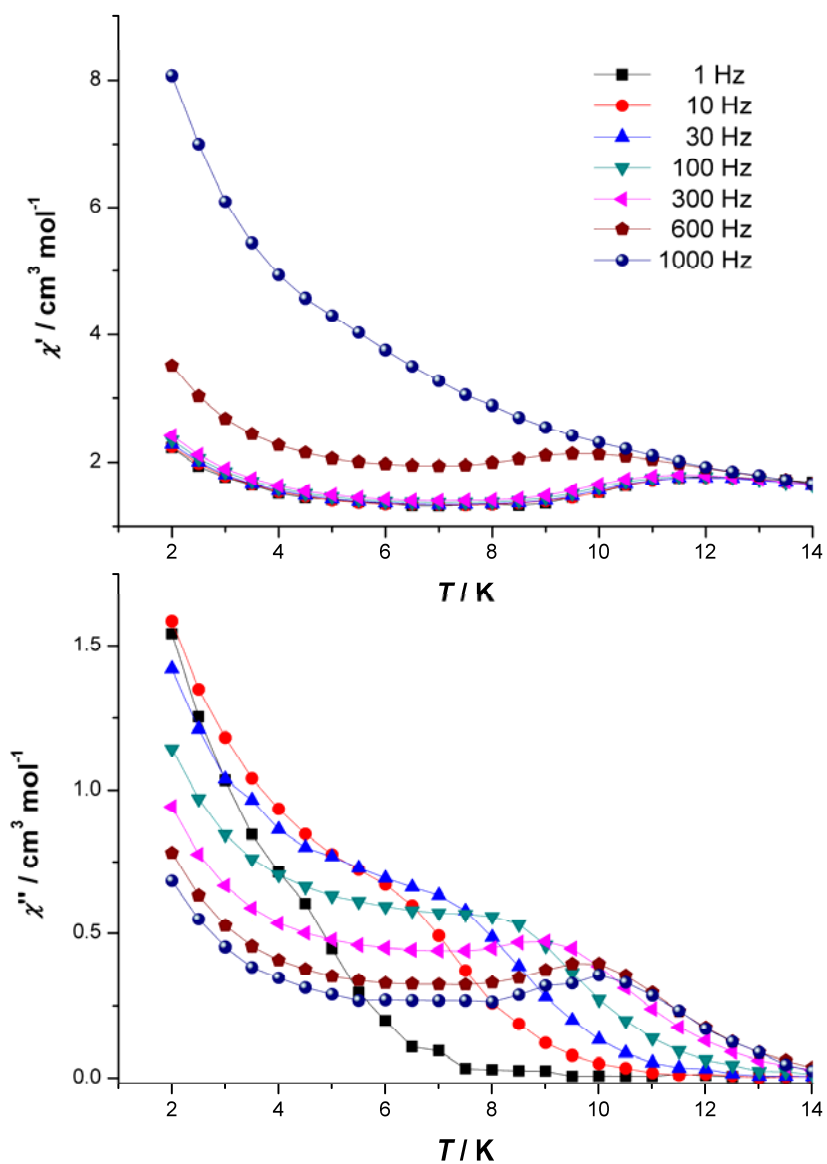

**Figure S14** Frequency dependence of the in-phase ( $\chi'$ , top) and out-of-phase ( $\chi''$ , bottom) ac susceptibility from 2 to 14 K under an applied field of 2000 Oe for **1**.



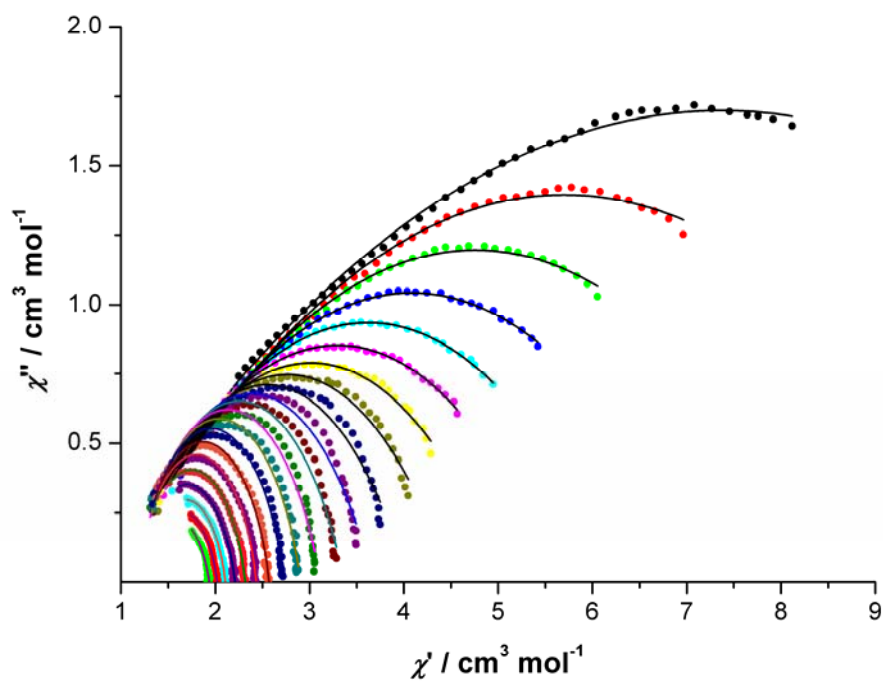

**Figure S15** Cole-Cole plots using the ac susceptibility data of **1** (2-12K, 0.5K interval).

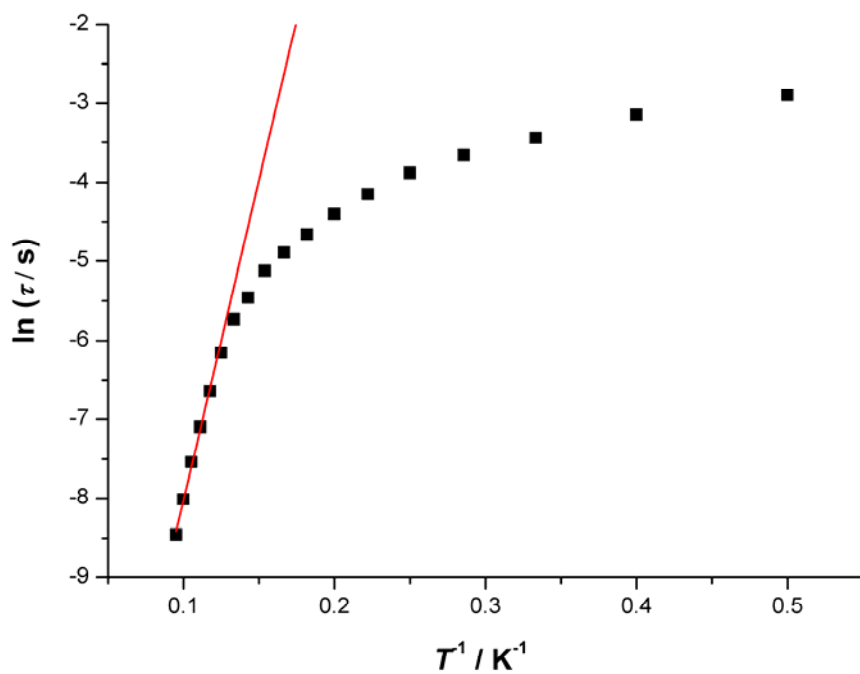

**Figure S16** The Relaxation time is plotted as  $\ln(\tau)$  vs  $T^{-1}$  for **1** under an applied field of 2000 Oe.

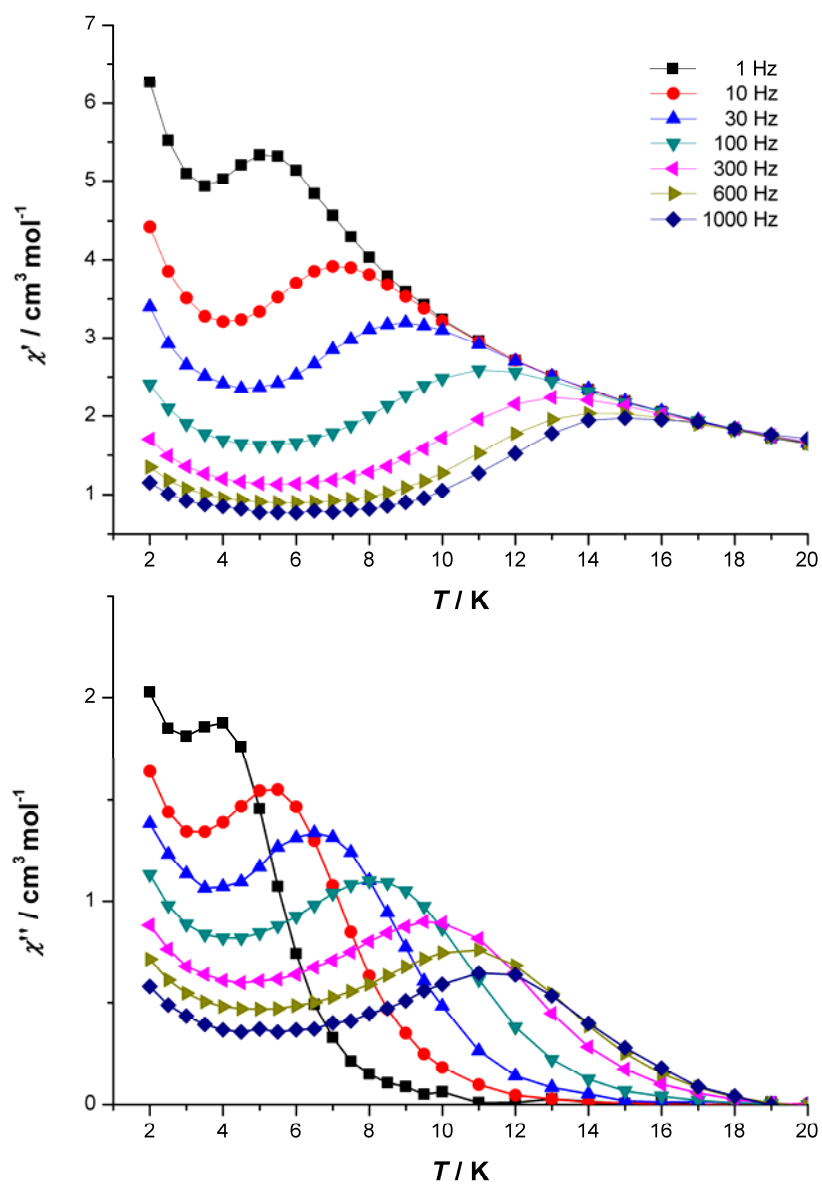

**Figure S17** Frequency dependence of the in-phase ( $\chi'$ , top) and out-of-phase ( $\chi''$ , bottom) ac susceptibility from 2 to 20 K under an applied field of 2000 Oe for **2**.

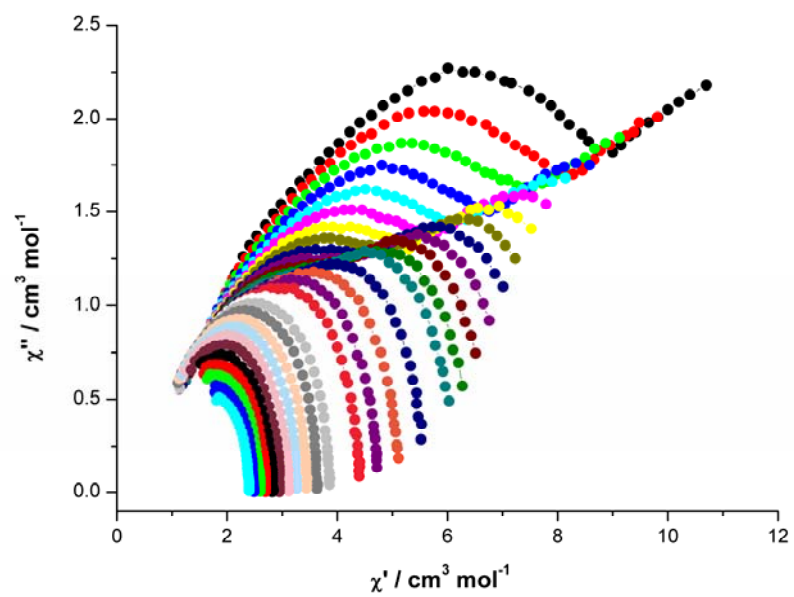

**Figure S18** Cole-Cole plots using the ac susceptibility data of **2** under an applied field of 2000 Oe (2-13K, 0.5K interval).

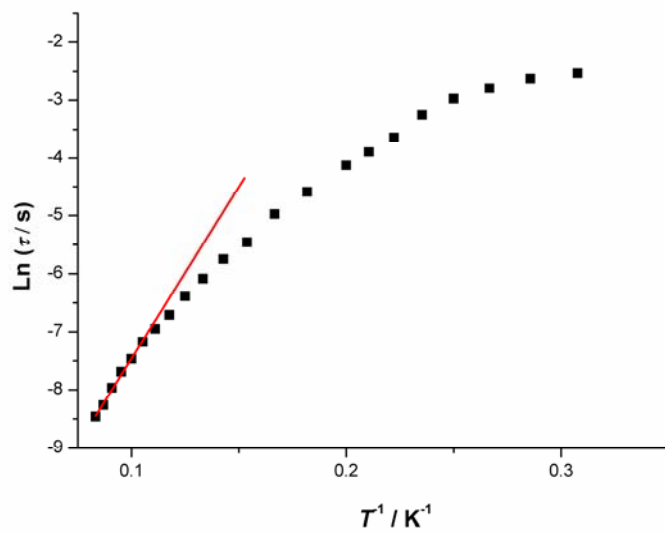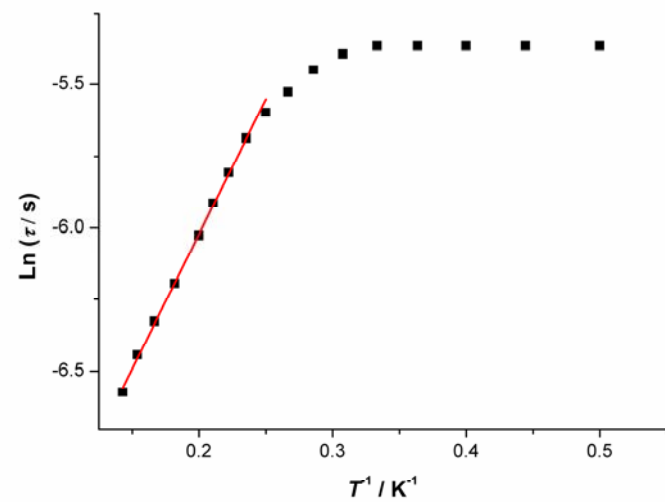

**Figure S19** The Relaxation times are plotted as  $\ln(\tau)$  vs  $T^{-1}$  for **2** under an applied field of 2000 Oe.

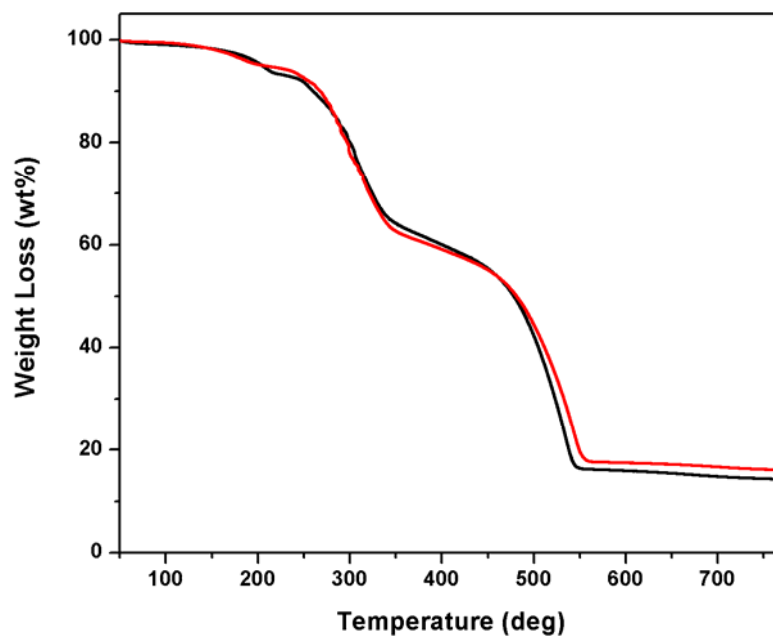

**Figure S20** Thermogravimetric curves for the precipitate of **1** (red line: precipitate washed with deionized water; black line: unwashed precipitate).

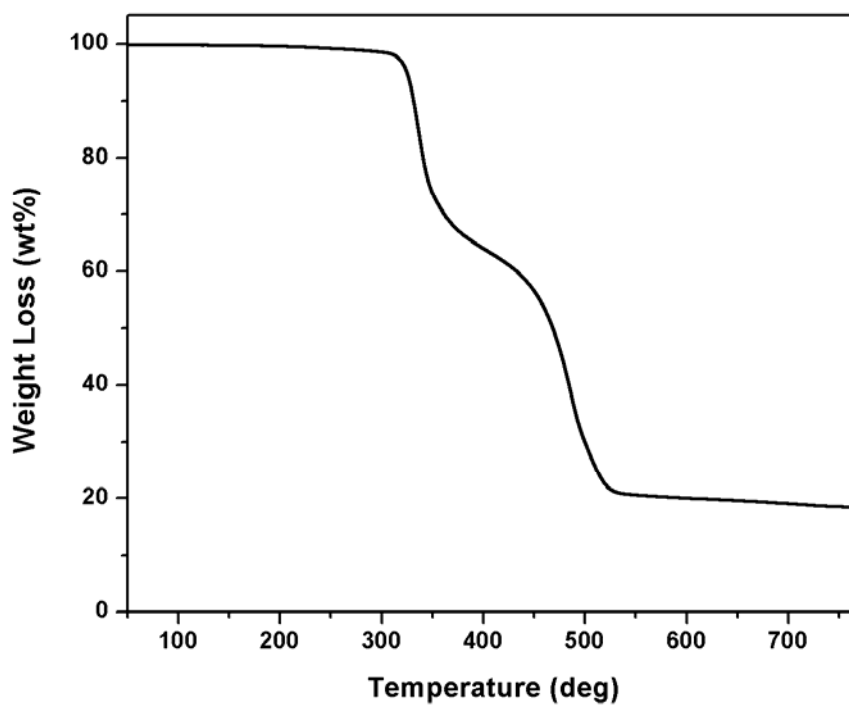

**Figure S21** Thermogravimetric curve for the precipitate of **2**.

Single crystal analysis indicates the existence of triethylammonium chloride in **1** and the thermogravimetric analysis is carried out on the as-synthesized precipitate of **1** (Fig. S20). A total weight loss of 85.74 wt% is found, which is lower than the expected value 84.19 wt% for the empirical formula  $[\text{C}_6\text{H}_{16}\text{N}]_2[\text{Dy}_2(\text{MBDA})_4]$ . It is supposed that the impurity of triethylammonium chloride might be involved in the as-synthesized precipitate of **1**. The precipitate is therefore washed with deionized water and dried under vacuum. The thermogravimetric analysis reveals a total weight loss of 83.91 wt% in accordance with the calculated value 84.19 wt%. In the first stage, a weight loss of 4.42 wt% (calcd. 4.28 wt%) is observed, owing to the removal of one triethylamine. In case of the unwashed precipitate, the weight loss of 6.27 wt% is ascribed to the removal of triethylammonium chloride (1.99 wt%) and one triethylamine. However, the subsequent decomposition might be a continuous process that it is hard to distinguish the removal of each ligand and second trimethylamine, respectively. The empirical formula of the unwashed precipitate is calculated as  $[\text{C}_6\text{H}_{16}\text{N}]_2[\text{Dy}_2(\text{MBDA})_4] \cdot 0.35(\text{C}_6\text{H}_{15}\text{N} \cdot \text{HCl})$ . The impurity of triethylammonium chloride in the unwashed precipitate is expected to result from excessive triethylamine and chloride anion. Fortunately, it might have been helpful to the crystallization of **1**. The thermogravimetric curve of the powder of **2** indicates a total weight loss of 81.65 wt% in good agreement with the calculated value 81.87 wt% (Fig. S21).

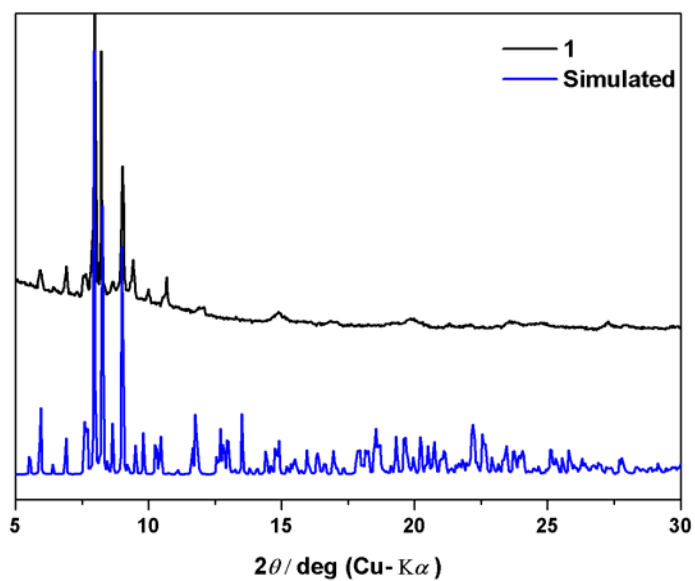

**Figure S22** Simulated and experimental PXRD patterns of **1**.

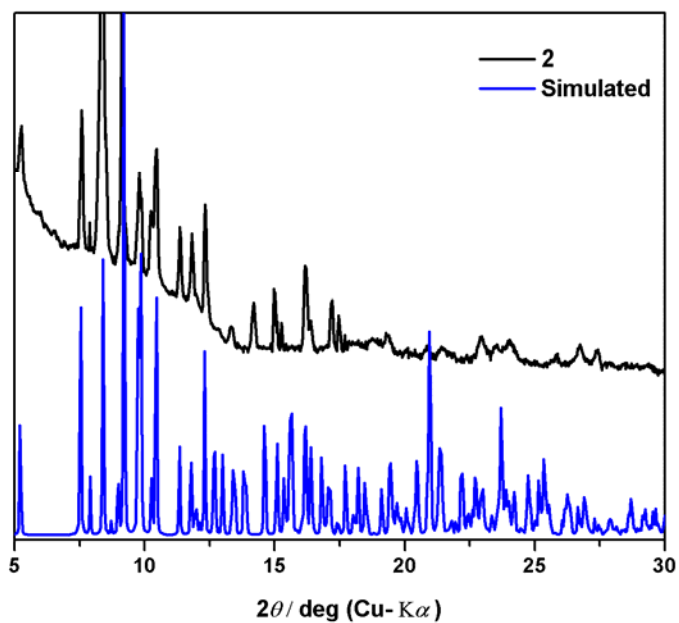

**Figure S23** Simulated and experimental PXRD patterns of **2**.

The crystals of **1** and **2** are supposed to be sensitive to the air that the crystals are deteriorated on desolvation, when they are exposed in air.

**References:**

- [1] G. M. Sheldrick, SHELXL-97, Program for X-ray Crystal Structure Refinement, University of Göttingen, Göttingen, Germany, 1997.
- [2] D. Casanova, M. Llunel, P. Alemany, S. Alvarez, Chem.–Eur. J. 2005, 11, 1479.
